# Supplementary material for: let-7c-5p regulates CyclinD1 in fluoride-mediated osteoblast proliferation and activation
Source: Oxford University Press journal article supplement (doi:10.1093/toxsci/kfab054), 2021-05-11
Supplement: kfab054_supplementary_data.docx [file kfab054_supplementary_data.docx]

**Supplementary Material**

**let-7c-5p regulates *CyclinD1* in fluoride-mediated osteoblast proliferation and activation**

Keke Luo1, Yu Qin2, Ting Ouyang1, Xilan Wang1, Aihua Zhang1, Peng Luo1#, Xueli Pan1#

1School of Public Health, The Key Laboratory of Environmental Pollution Monitoring and Disease Control, Ministry of Education, Guizhou Medical University, Guiyang, 550025, China

2 Guizhou Orthopedics Hospital, Guiyang, 550007, China

# To whom correspondence should be addressed at School of Public Health, Guizhou Medical University, Guiyang 550025, China. E-mail: [xuelipan@gmc.edu.cn](mailto:xuelipan@gmc.edu.cn) and [luopeng@gmc.edu.cn](mailto:luopeng@gmc.edu.cn).

**Supplemental Table 1** Primers of mRNA used in qRT-PCR.

| Gene | Primer sequences |
| --- | --- |
| *CyclinD1* F | 5′-GGGCCACTTGCATGTTCGT-3′ |
| *CyclinD1* R  *Wnt9a* F  *Wnt9a* R | 5′-CAGGTTCCACTTGAGCTTGTTCAC-3′  5′-GCATCTGAAGCACAAGTATGAG-3′  5′-CAGAAGCTAGGCGAGTCATC-3′ |
| *GAPDH* F | 5′-GCACCGTCAAGGCTGAGAAC -3′ |
| *GAPDH* R | 5′- TGGTGAAGACGCCAGTGGA -3′ |

**Supplemental Table 2** Primers used in ChIP-qRT-PCR.

| Gene | Primer sequences |
| --- | --- |
| *ChIP 1* F | 5′-ACCTCCACCTCACCCCCTAA-3′ |
| *ChIP 1* R  *ChIP* 2 F  *ChIP* 2 R  *GAPDH* F  *GAPDH* R | 5′-GCAACTTCAACAAAACTCCCCT-3′  5′-CGTCCATGCGGAAGATCGT-3′  5′-GGGGGGTGAGTAGCAAAGAAA-3′  5′-GCCATGTAGACCCCTTGAAGAG-3′  5′-ACTGGTTGAGCACAGGGTACTTTAT-3′ |


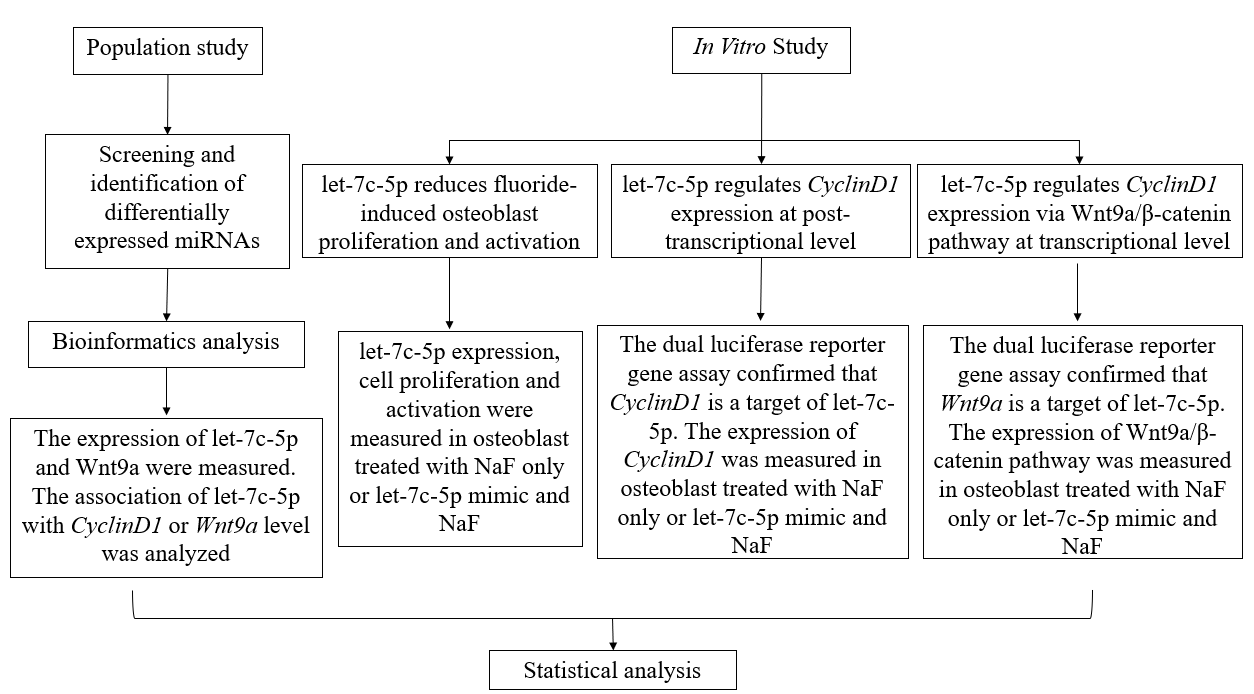


Supplementary figure 1. The flowchart of experimental design.
